# Supplementary material
Source: PubMed Central journal article supplement (PMC3346382)
Supplement: supp_78.11.3905_AEM-AEM00193-12-s01.pdf [file supp_78.11.3905_AEM-AEM00193-12-s01.pdf]

1 **Supporting Information**

2 **To**

3  
4 **Impacts of Hematite Nanoparticle Exposure on Biomechanical,**  
5 **Adhesive, and Surface Electrical Properties of *E. coli* Cells**

6 Wen Zhang<sup>1</sup>, Joseph Hughes<sup>1,2,3</sup> and Yongsheng Chen<sup>1\*</sup>

7 <sup>1</sup>School of Civil and Environmental Engineering, Georgia Institute of Technology,  
8 Atlanta, Georgia, 30332. <sup>2</sup>School of Materials Science and Engineering, Georgia Institute  
9 of Technology, Atlanta, Georgia, 30332, <sup>3</sup>College of Engineering, Drexel University,  
10 Philadelphia, PA 19104

11  
12  
13 \*To whom correspondence should be addressed:

14 Dr. Yongsheng Chen,

15 Department of Civil and Environmental Engineering

16 Georgia Institute of Technology, Atlanta, Georgia, 30332

17 E-mail: yongsheng.chen@ce.gatech.edu;

18 Phone: (+1) 404-894-3089; Fax: 404-894-2278

19  
20  
21  
22  
23  
24  

---

\*Corresponding author phone: (+1) 404-894-3089, Fax: (+1) 404-894-2278, and e-mail:  
yongsheng.chen@ce.gatech.edu.

- 25 **This supporting information includes the following sections:**
- 26 S1. Justification of the loading force magnitude in the AFM force measurement
- 27 S2. SEM analysis (Fig. S1)
- 28 S3. Young's modulus calculation using Hertz model
- 29 S4. Electrophoretic mobility (EPM) measurement and PSD changes over different
- 30 adsorption time (Table S1 and Fig. S2)
- 31 S5. Histogram of surface potential distribution of hematite NPs (Fig. S3)
- 32 S6. More images of *E. coli* cells using KPFM (Fig. S4)
- 33 S7. Correlation between the adsorbed mass of hematite NPs and surface potentials of *E.*
- 34 *coli* cells (Fig. S5)
- 35 References
- 36

37 **S1. Justification of the loading force magnitude in the AFM force measurement**

38 A maximum loading force of 4 nN was chose to push the tip against the cell surface  
39 to measure the surface hardness. We intend to measure the indentation for the  
40 tip-membrane interactions instead of measuring the interaction forces on the outside layer  
41 of the cell (e.g., surface appendages–pili or surface brushes). This is partly because the  
42 physical disruption from hematite exposure likely altered the mechanical properties of the  
43 cell membrane (2, 6, 7, 9, 11), which is beneath the tightly packed lipopolysaccharide  
44 (LPS) molecules and mainly determines the mechanical response. More importantly,  
45 through changing the adhesiveness or mechanical properties, the sorption of hematite NPs  
46 could disrupt the integrity of the cytoplasm membrane structure (4). Thus, quantifying  
47 the membrane property is more relevant in this study. Since Velegol and Logan indicated  
48 that in the nonlinear regime the tip contacted the outer membrane but had yet to encounter  
49 the stiff peptidoglycan layer (12), we applied a relatively high loading force (~nN) in an  
50 effort to engage the tip with the membrane membrane regions, which was also suggested  
51 previously (13). As seen from the compliance curve in Fig. 3, the 4-nN loading force led  
52 to a linear regime that indicates the tip contact with the inner membrane.

53

54 S2. SEM analysis

55

56

57

58

59

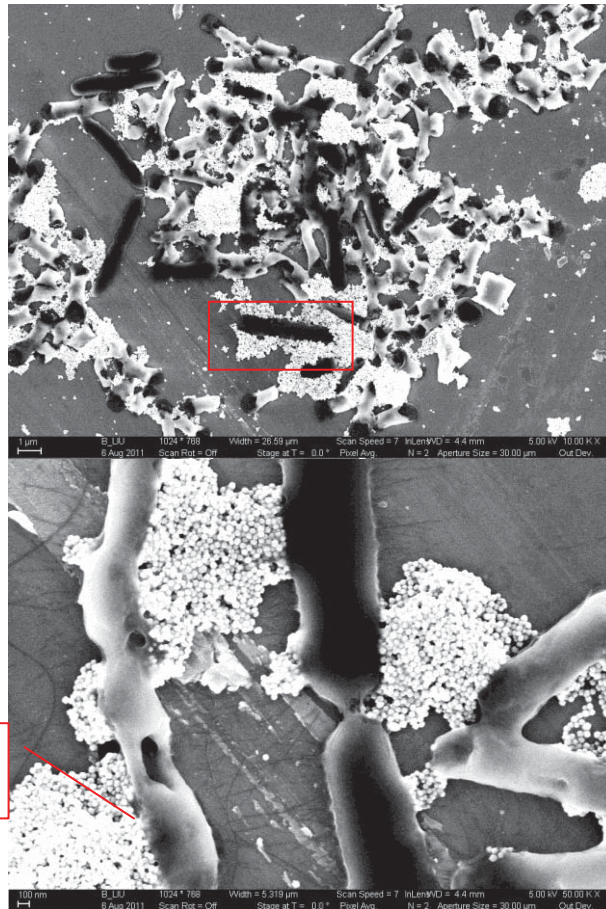

65

66 Fig. S1 SEM images of *E. coli* cells with adsorbed hematite NPs. The enlarge area of  
67 the red box is also shown in Fig. 1c.

68

69

70 **S3. Young's modulus calculation using Hertz model**

71 The hardness of the cells can be evaluated by the Hertz model as expressed below:

72 
$$F = \frac{4\sqrt{R_c}}{3} \frac{E}{1-\nu^2} \delta^{3/2} \quad (\text{S1})$$

73 where  $F$  is the loading force exerted by the tip on the surface (nN),  $R_c$  is the radius of tip  
74 curvature (approximately 20 nm as provided by the manufacture),  $E$  is the reduced  
75 Young's module of *E. coli* cells (Pa),  $\nu$  is the Poisson's ratio (usually set to 0.5) (3, 10),  
76 and  $\delta$  is the indentation (nm). The calculated Young's module of *E. coli* cells was in the  
77 range of 52.7 kPa to 0.38 MPa, which is lower than the reported values of ~25 MPa (1,  
78 14). The discrepancy could be ascribed to the uncertainties in the radius of the tip  
79 (usually varies with different batches of manufacturing) and in the measurement  
80 indentation.

81

82 **S4. Electrophoretic mobility (EPM) measurement and PSD changes over different**  
83 **sorption time**

84 Because the von Smoluchowski equation is valid for particles with uniform surface  
85 charge density, which is not true for bacteria, and moreover, the exact location of the  
86 shear plane for *E. coli* cells is hard to determine. Therefore, the EMP measurement is  
87 directly presented here in addition to zeta potentials and again, the EMP values of *E. coli*  
88 cells were not significantly different over different exposure time. A detailed  
89 interpretation of the EPM changes is difficult and beyond the scope of this study.  
90 However, it is clear that the gradual increase in EPM is probably caused by the increase  
91 of the global electrostatic charge due to the progressive coverage of NPs (5).

92 Table S1 EPM measurements

|                                       | Hematite NPs<br>in PBS | <i>E. coli</i> cells<br>in PBS | 1 min<br>exposure | 5 min<br>exposure | 15 min<br>exposure | 45 min<br>exposure |
|---------------------------------------|------------------------|--------------------------------|-------------------|-------------------|--------------------|--------------------|
| EPM,<br>$\mu\text{m/s}/(\text{V/cm})$ | -3.78 $\pm$ 2.37       | -0.32 $\pm$ 0.00               | -2.16 $\pm$ 1.28  | -1.73 $\pm$ 1.23  | -2.27 $\pm$ 1.3    | -1.97 $\pm$ 1.23   |

93

94

95  
96  
97  
98  
99  
100  
101  
102  
103  
104  
105  
106  
107  
108  
109  
110  
111  
112  
113

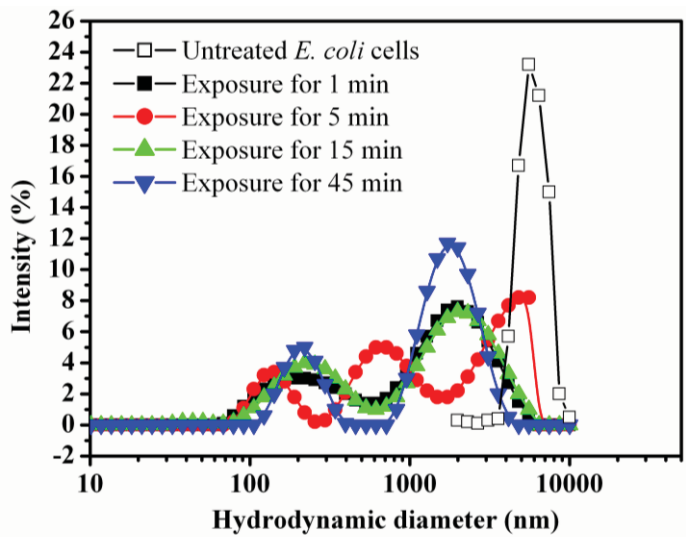

Fig. S2 Modality of PSD of the bacterial suspension at different exposure or adsorption times.

114 **S5. Histogram of surface potential distribution of hematite NPs.**

115

116

117

118

119

120

121

122

123

124

125

126

127

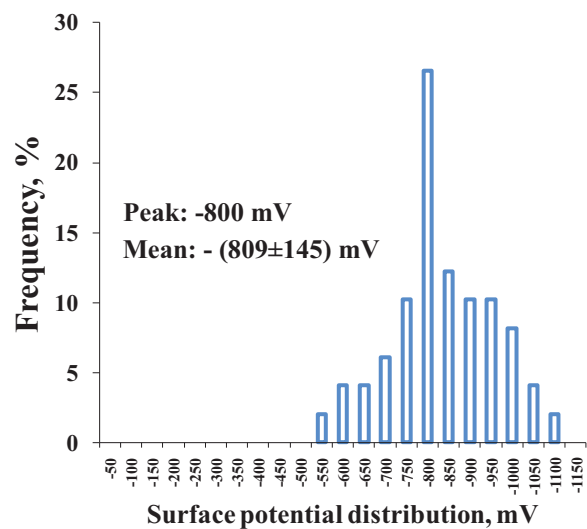

128

129

Figure S3. Histogram of the surface potential distribution measured from 50 NPs randomly chosen from Figure 5b.

130



131 S6. More images of *E. coli* cells using KPFM

132

133

134

135

136

137

138

139

140

141

142

143

144

145

146

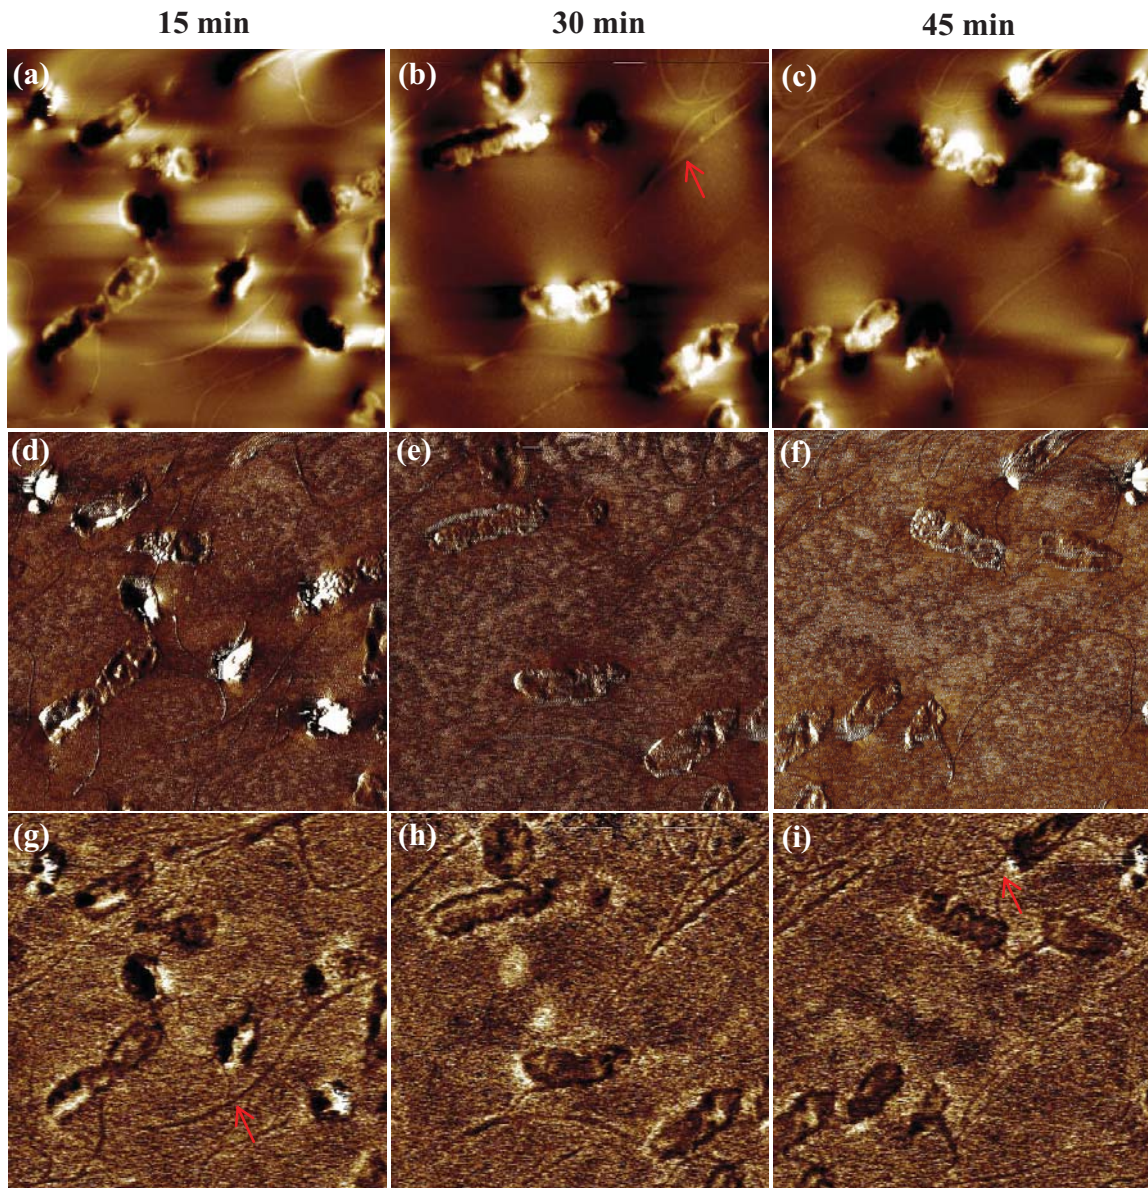

147 Figure S4. AFM images of *E. coli* cells. (a)-(c) are topography, (d)-(f) are phase, and

148 (g)-(h) are surface potential images. The left column images were taken after drying for

149 approximately 15 min; the middle column, 30 min; and the right column, 45 min. The

150 scan area of each image is  $5 \mu\text{m} \times 5 \mu\text{m}$ . The red arrows point at a tail-like flagella.

151

152 **S7. Correlation between adsorbed mass of hematite NPs and surface potentials of *E.***  
153 ***coli* cells**

154 As discussed previously, the surface potential decrease of *E. coli* cells should be  
155 caused by the adsorption of hematite NPs. Detailed adsorption kinetics of hematite NPs  
156 on *E. coli* cells has been investigated previously (15). Here we further used KPFM to  
157 determine the surface potentials of *E. coli* cells by randomly selecting 10 positions in the  
158 cell surface at different exposure time and then obtained the average surface potentials.  
159 Figure S5 plotted the average surface potentials at different exposure time versus the  
160 estimated corresponding mass of hematite NPs per *E. coli* surface area. The surface  
161 area that was available for hematite adsorption was estimated as follows: a single *E. coli*  
162 cell has  $2.5 \times 10^{-13}$  g volatile suspended solid (VSS) and a volume of  $6 \times 10^{-12}$  m<sup>3</sup> (8). In  
163 each test tube, approximately 0.1 mg/ml *E. coli* cells were dispersed in a total volume of  
164 10 ml suspension; thus, approximately 1 mg *E. coli* cells were present in each test tube,  
165 corresponding to  $4.0 \times 10^9$  cells and 0.024 m<sup>2</sup> surface area that is available for the  
166 adsorption of hematite NPs. With the quantification of hematite loss in the aqueous  
167 phase of the 10-ml test tube, we could determine the adsorbed mass of hematite divided  
168 by the total surface area (0.024 m<sup>2</sup>). Apparently, as the hematite NP adsorbed on the  
169 cell surfaces, the average surface potential dropped significantly in a non-linear fashion.

170

171  
172  
173  
174  
175  
176  
177  
178  
179  
180  
181  
182  
183  
184  
185  
186  
187  
188  
189  
190  
191

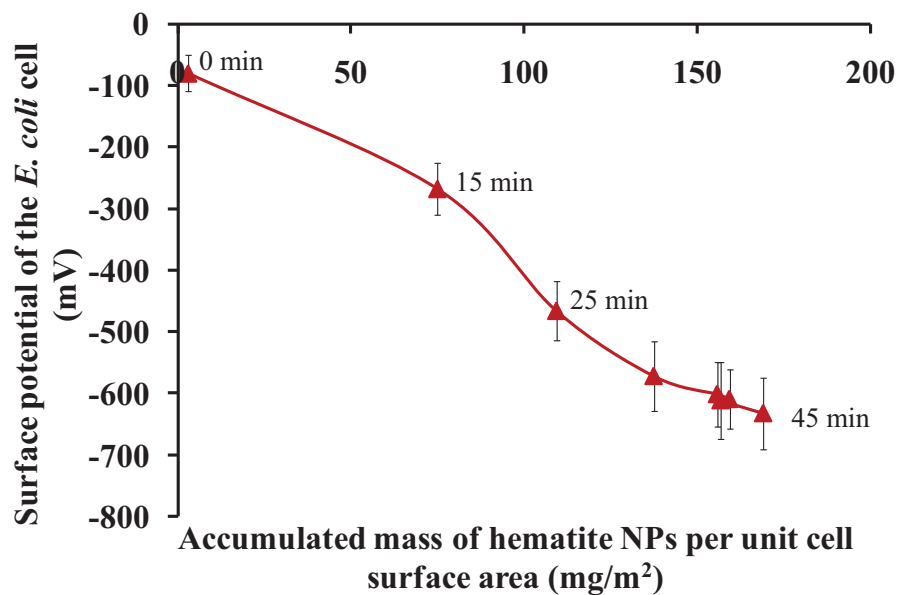

Figure S5. The accumulated mass of hematite NPs on the unit surface area of the cell versus the surface potentials of the *E. coli* cells at different exposure times. All data points are averages from the surface potential measurements on different positions of 15 hematite-treated cells, and error bars represent standard deviation.

192 **References**

- 193 1. **Boulbitch, A., B. Quinn, and D. Pink.** 2000. Elasticity of the rod-shaped Gram-negative  
194 eubacteria. *Phys. Rev. Lett.* **85**:5246-5249.
- 195 2. **Brayner, R., R. Ferrari-Iliou, N. Brivois, S. Djediat, M. F. Benedetti, and F. Fievet.** 2006.  
196 Toxicological impact studies based on *Escherichia coli* bacteria in ultrafine ZnO nanoparticles  
197 colloidal medium. *Nano Lett.* **6**:866-870.
- 198 3. **Butt, H.-J., B. Cappella, and M. Kappl.** 2005. Force measurements with the atomic force  
199 microscope: Technique, interpretation and applications. *Surf. Sci. Rep.* **59**:1-152.
- 200 4. **Che, C. M., C. N. Lok, C. M. Ho, R. Chen, Q. Y. He, W. Y. Yu, H. Z. Sun, P. K. H. Tam, and J.**  
201 **F. Chiu.** 2006. Proteomic analysis of the mode of antibacterial action of silver nanoparticles.  
202 *Journal of Proteome Research* **5**:916-924.
- 203 5. **Duval, J. F. L., and H. Ohshima.** 2006. Electrophoresis of diffuse soft particles. *Langmuir*  
204 **22**:3533-3546.
- 205 6. **Huang, Z., X. Zheng, D. Yan, G. Yin, X. Liao, Y. Kang, Y. Yao, D. Huang, and B. Hao.** 2008.  
206 Toxicological effect of ZnO nanoparticles based on bacteria. *Langmuir* **24**:4140-4144.
- 207 7. **Li, M., L. Zhu, and D. Lin.** 2011. Toxicity of ZnO nanoparticles to *Escherichia coli*: mechanism  
208 and the influence of medium components. *Environ. Sci. Technol.* **45**:1977-1983.
- 209 8. **Madigan, M. T., J. M. Martinko, P. V. Dunlap, and D. P. Clark.** 2000. *Brock Biology of*  
210 *Microorganisms*, 9th ed. Benjamin Cummings
- 211 9. **Morones, J. R., J. L. Elechiguerra, A. Camacho, K. Holt, J. B. Kouri, J. T. Ramirez, and M.**  
212 **J. Yacaman.** 2005. The bactericidal effect of silver nanoparticles. *Nanotechnology* **16**:2346-2353.

- 213 10. **Radmacher, M., M. Fritz, J. P. Cleveland, D. A. Walters, and P. K. Hansma.** 1994. Imaging  
214 Adhesion Forces and Elasticity of Lysozyme Adsorbed on Mica with the Atomic-Force  
215 Microscope. *langmuir* **10**:3809-3814.
- 216 11. **Shah, S. I., J. Thiel, L. Pakstis, S. Buzby, M. Raffi, C. Ni, and D. J. Pochan.** 2007.  
217 Antibacterial properties of silver-doped titania. *Small* **3**:799-803.
- 218 12. **Velegol, S. B., and B. E. Logan.** 2002. Contributions of bacterial surface polymers, electrostatics,  
219 and cell elasticity to the shape of AFM force curves. *Langmuir* **18**:5256-5262.
- 220 13. **Volle, C. B., M. A. Ferguson, K. E. Aidala, E. M. Spain, and M. E. Núñez.** 2008. Quantitative  
221 changes in the elasticity and adhesive properties of *Escherichia coli* ZK1056 prey cells during  
222 predation by *Bdellovibrio bacteriovorus* 109J. *Langmuir* **24**:8102-8110.
- 223 14. **Yao, X., M. Jericho, D. Pink, and T. Beveridge.** 1999. Thickness and Elasticity of  
224 Gram-Negative Murein Sacculi Measured by Atomic Force Microscopy. *J. Bacteriol.*  
225 **181**:6865-6875.
- 226 15. **Zhang, W., B. Rittmann, and Y. Chen.** 2011. Size effects on adsorption of hematite  
227 nanoparticles on *E. coli* cells. *Environ. Sci. Technol.* **45**:2172-2178.

228  
229  
230
